# Supplementary material for: Validation of the adherence evaluation of osteoporosis treatment (ADEOS) questionnaire for osteoporotic post-menopausal women
Source: Springer Nature journal article supplement (doi:10.1007/s00198-011-1555-8), 2011-04-05
Supplement: MOESM1 [file 8157644]

# L'ostéoporose et son traitement

**Avant de compléter le questionnaire, merci d'indiquer la date  
d'aujourd'hui :**

/\_/\_/\_/ /\_/\_/\_/ /\_/\_/\_/\_/\_/\_/  
jour mois année

Les questions suivantes concernent votre ostéoporose et son traitement.

Pour répondre aux questions suivantes, il vous suffit de cocher la ou les case(s)  
qui correspondent le mieux à votre situation.

Nous vous remercions de remplir ce questionnaire dans un endroit calme et si  
possible seule. Prenez tout le temps qui vous sera nécessaire.

Nous vous remercions de votre participation.

**Les informations contenues dans ce questionnaire sont strictement confidentielles et seront  
traitées dans le respect de votre anonymat.**

**Ce questionnaire porte sur le traitement pour l'ostéoporose suivant :**

|       |
|-------|
| ..... |
|-------|

*A remplir par le médecin*

**Pour chacune des questions suivantes, veuillez cocher la case ou les cases qui s'appliquent le mieux à votre situation :**

**1. Trouvez-vous que votre traitement pour l'ostéoporose est facile à prendre ?**

- |                          |                    |    |
|--------------------------|--------------------|----|
| <input type="checkbox"/> | Très facile        | ★★ |
| <input type="checkbox"/> | Moyennement facile | ★  |
| <input type="checkbox"/> | Pas facile du tout | -  |

**2. Avez-vous eu des consignes précises à suivre pour la prise de votre traitement pour l'ostéoporose ?**

- |                          |                |   |
|--------------------------|----------------|---|
| <input type="checkbox"/> | Oui            | - |
| <input type="checkbox"/> | Non            | - |
| <input type="checkbox"/> | Je ne sais pas | ○ |

**3. Les consignes pour prendre votre traitement pour l'ostéoporose sont-elles contraignantes ?**

- |                          |                            |    |
|--------------------------|----------------------------|----|
| <input type="checkbox"/> | Très contraignantes        | ○○ |
| <input type="checkbox"/> | Moyennement contraignantes | ○  |
| <input type="checkbox"/> | Pas contraignantes du tout | -  |

**4. Vous arrive-t-il d'oublier de prendre votre traitement pour l'ostéoporose ?**

- |                          |         |    |
|--------------------------|---------|----|
| <input type="checkbox"/> | Jamais  | -  |
| <input type="checkbox"/> | Parfois | ○  |
| <input type="checkbox"/> | Souvent | ○○ |

**5. En cas d'imprévu, vous arrive-t-il de sauter une prise de votre traitement ?**

- |                          |         |    |
|--------------------------|---------|----|
| <input type="checkbox"/> | Jamais  | -  |
| <input type="checkbox"/> | Parfois | ○  |
| <input type="checkbox"/> | Souvent | ○○ |

**6. Comment faites-vous pour penser à prendre votre traitement pour l'ostéoporose ? (vous pouvez cocher plusieurs cases)**

- |                          |                                            |   |
|--------------------------|--------------------------------------------|---|
| <input type="checkbox"/> | Mon entourage me le rappelle               | - |
| <input type="checkbox"/> | J'ai des astuces                           | - |
| <input type="checkbox"/> | C'est un automatisme                       | ★ |
| <input type="checkbox"/> | Autre : .....                              | - |
| <input type="checkbox"/> | Je ne sais pas comment faire pour y penser | ○ |

7. **Qu'est ce qui vous motive à prendre votre traitement pour l'ostéoporose ?** (*vous pouvez cocher plusieurs cases*)

- |                          |                         |   |
|--------------------------|-------------------------|---|
| <input type="checkbox"/> | Mon médecin             | - |
| <input type="checkbox"/> | Mon entourage           | - |
| <input type="checkbox"/> | La peur des fractures   | - |
| <input type="checkbox"/> | Pour préserver mes os   | ★ |
| <input type="checkbox"/> | Il est facile à prendre | - |
| <input type="checkbox"/> | Rien de particulier     | - |
| <input type="checkbox"/> | Autre : .....           | - |

8. **A quel point êtes-vous motivée pour poursuivre votre traitement pour l'ostéoporose ?**

- |                          |                     |    |
|--------------------------|---------------------|----|
| <input type="checkbox"/> | Très motivée        | ★★ |
| <input type="checkbox"/> | Moyennement motivée | ★  |
| <input type="checkbox"/> | Pas motivée du tout | -  |

---

**Pour chacune des affirmations suivantes, veuillez cocher la case qui correspond le mieux à ce que vous pensez :**

9. **"Mon traitement pour l'ostéoporose est important pour ma santé."**

- |                          |                  |    |
|--------------------------|------------------|----|
| <input type="checkbox"/> | Oui, tout à fait | ★★ |
| <input type="checkbox"/> | Plus ou moins    | ★  |
| <input type="checkbox"/> | Non, pas du tout | -  |

10. **"Je me suis bien habituée à mon traitement pour l'ostéoporose."**

- |                          |                  |    |
|--------------------------|------------------|----|
| <input type="checkbox"/> | Oui, tout à fait | ★★ |
| <input type="checkbox"/> | Plus ou moins    | ★  |
| <input type="checkbox"/> | Non, pas du tout | -  |

11. **"Je fais attention de suivre à la lettre les consignes qui m'ont été données pour prendre mon traitement pour l'ostéoporose."**

- |                          |                  |    |
|--------------------------|------------------|----|
| <input type="checkbox"/> | Oui, tout à fait | ★★ |
| <input type="checkbox"/> | Plus ou moins    | ★  |
| <input type="checkbox"/> | Non, pas du tout | -  |

12. **"Les consignes à suivre pour prendre mon traitement sont suffisamment claires."**

- |                          |                  |    |
|--------------------------|------------------|----|
| <input type="checkbox"/> | Oui, tout à fait | ★★ |
| <input type="checkbox"/> | Plus ou moins    | ★  |
| <input type="checkbox"/> | Non, pas du tout | -  |
-

## Réservé au médecin

- 1- Afin d'aligner les réponses de la patiente aux ★ et ○ correspondants, pliez le document selon les pointillés en suivant le sens de la flèche
- 2-Entourez les ★ et les ○ correspondants aux réponses de votre patiente aux questions 1 à 6
- 3- Ouvrez le questionnaire en conservant le bord de la page 4 pliée, et entourez les ★ correspondant aux réponses de votre patiente aux questions 7 à 12
- 4- Comptez le nombre de ★ et le nombre de ○ correspondants aux réponses 1 à 12 et reportez les totaux dans le cadre ci-dessous
- 5- Pour le calcul du score, reportez les totaux correspondant à la somme des ★ et des ○ et effectuez la soustraction et ajoutez 8 pour obtenir le score.

**TOTAL ★ ○**

**Total global:**

**Nombre de ★ : .....**

**Nombre de ○ : .....**

**Calcul du score:**

**SCORE = Nombre de ★ – Nombre de ○ + 8 : .....**

# Medication for osteoporosis

Before completing this questionnaire, please write in today's date:

/\_/\_/\_/   /\_/\_/\_/   /\_/\_/\_/\_/\_/  
month   day   year

The following questions concern your osteoporosis medication.

Please answer the following questions by checking the box or boxes that best describe your situation.

Please fill out this questionnaire in a quiet place, and, if possible, alone. Take as much time as you need.

Thank you for participating.

**The information in this questionnaire is strictly confidential. We will protect your anonymity when processing your information.**

**This questionnaire concerns the following osteoporosis medication:**

|       |
|-------|
| ..... |
|-------|

**To be completed by the physician**

For each of the following questions, please check the box or boxes that best describe your situation:

1. Do you feel that your osteoporosis medication is easy to take?

- |                          |                 |    |
|--------------------------|-----------------|----|
| <input type="checkbox"/> | Very easy       | ★★ |
| <input type="checkbox"/> | Somewhat easy   | ★  |
| <input type="checkbox"/> | Not at all easy | -  |

2. Did you receive specific instructions on how to take your osteoporosis medication?

- |                          |              |   |
|--------------------------|--------------|---|
| <input type="checkbox"/> | Yes          | - |
| <input type="checkbox"/> | No           | - |
| <input type="checkbox"/> | I don't know | ○ |

3. Are the instructions for taking your osteoporosis medication inconvenient for you?

- |                          |                         |    |
|--------------------------|-------------------------|----|
| <input type="checkbox"/> | Very inconvenient       | ○○ |
| <input type="checkbox"/> | Somewhat inconvenient   | ○  |
| <input type="checkbox"/> | Not at all inconvenient | -  |

4. Do you ever forget to take your osteoporosis medication?

- |                          |           |    |
|--------------------------|-----------|----|
| <input type="checkbox"/> | Never     | -  |
| <input type="checkbox"/> | Sometimes | ○  |
| <input type="checkbox"/> | Often     | ○○ |

5. Do you ever skip your medication because of unexpected circumstances?

- |                          |           |    |
|--------------------------|-----------|----|
| <input type="checkbox"/> | Never     | -  |
| <input type="checkbox"/> | Sometimes | ○  |
| <input type="checkbox"/> | Often     | ○○ |

6. How do you remind yourself to take your osteoporosis medication? (you may check more than one box)

- |                          |                                     |   |
|--------------------------|-------------------------------------|---|
| <input type="checkbox"/> | The people around me remind me      | - |
| <input type="checkbox"/> | I have a way to remind myself       | - |
| <input type="checkbox"/> | It has become natural to me         | ★ |
| <input type="checkbox"/> | Other: (specify)                    | - |
| <input type="checkbox"/> | I don't know what to do to remember | ○ |

7. What motivates you to take your osteoporosis medication? (you may check more than one box)

- |                          |                                |   |
|--------------------------|--------------------------------|---|
| <input type="checkbox"/> | My physician                   | - |
| <input type="checkbox"/> | The people around me           | - |
| <input type="checkbox"/> | I am afraid of breaking a bone | - |
| <input type="checkbox"/> | To maintain bone health        | ★ |
| <input type="checkbox"/> | It is easy to take             | - |
| <input type="checkbox"/> | Nothing in particular          | - |
| <input type="checkbox"/> | Other: (specify)               | - |

**8. How motivated are you to keep taking your osteoporosis medication?**

- |                          |                      |    |
|--------------------------|----------------------|----|
| <input type="checkbox"/> | Very motivated       | ★★ |
| <input type="checkbox"/> | Somewhat motivated   | ★  |
| <input type="checkbox"/> | Not at all motivated | -  |

---

**For each of the following statements, please check the box that best describes your opinion:**

**9. "My osteoporosis medication is important to my health."**

- |                          |                 |    |
|--------------------------|-----------------|----|
| <input type="checkbox"/> | Yes, completely | ★★ |
| <input type="checkbox"/> | Somewhat        | ★  |
| <input type="checkbox"/> | No, not at all  | -  |

**10. "I have become used to taking my osteoporosis medication."**

- |                          |                 |    |
|--------------------------|-----------------|----|
| <input type="checkbox"/> | Yes, completely | ★★ |
| <input type="checkbox"/> | Somewhat        | ★  |
| <input type="checkbox"/> | No, not at all  | -  |

**11. "I make sure to carefully follow the instructions I'm given about taking my osteoporosis medication."**

- |                          |                 |    |
|--------------------------|-----------------|----|
| <input type="checkbox"/> | Yes, completely | ★★ |
| <input type="checkbox"/> | Somewhat        | ★  |
| <input type="checkbox"/> | No, not at all  | -  |

**12. "The instructions for taking my osteoporosis medication are clear enough."**

- |                          |                 |    |
|--------------------------|-----------------|----|
| <input type="checkbox"/> | Yes, completely | ★★ |
| <input type="checkbox"/> | Somewhat        | ★  |
| <input type="checkbox"/> | No, not at all  | -  |

*Thank you for answering this questionnaire.*

---

Fold in this direction

## Reserved for the physician

- 1- In order to match patient responses with the corresponding ★ and ○, fold the document along the dotted line in the direction of the arrow.
- 2- Circle the ★ and ○ corresponding to your patient's responses to questions 1 through 6.
- 3- Open the questionnaire keeping the edge of page 4 folded and circle the ★ corresponding to your patient's responses to questions 7 through 12.
- 4- Count the number of ★ and the number of ○ corresponding to the responses 1 through 12 and copy the total in the box below.
- 5- To calculate the score, copy the totals corresponding to the sum of ★ and ○ and subtract the two and add 8 to get the score, as indicated below.

### TOTAL

★ ○

### Overall total

★ = \_\_\_\_\_

○ = \_\_\_\_\_

### SCORE CALCULATION

SCORE = Total of ★ – Total of ○ + 8 = \_\_\_\_\_
